# Supplementary material
Source: PubMed Central journal article supplement (PMC122909)

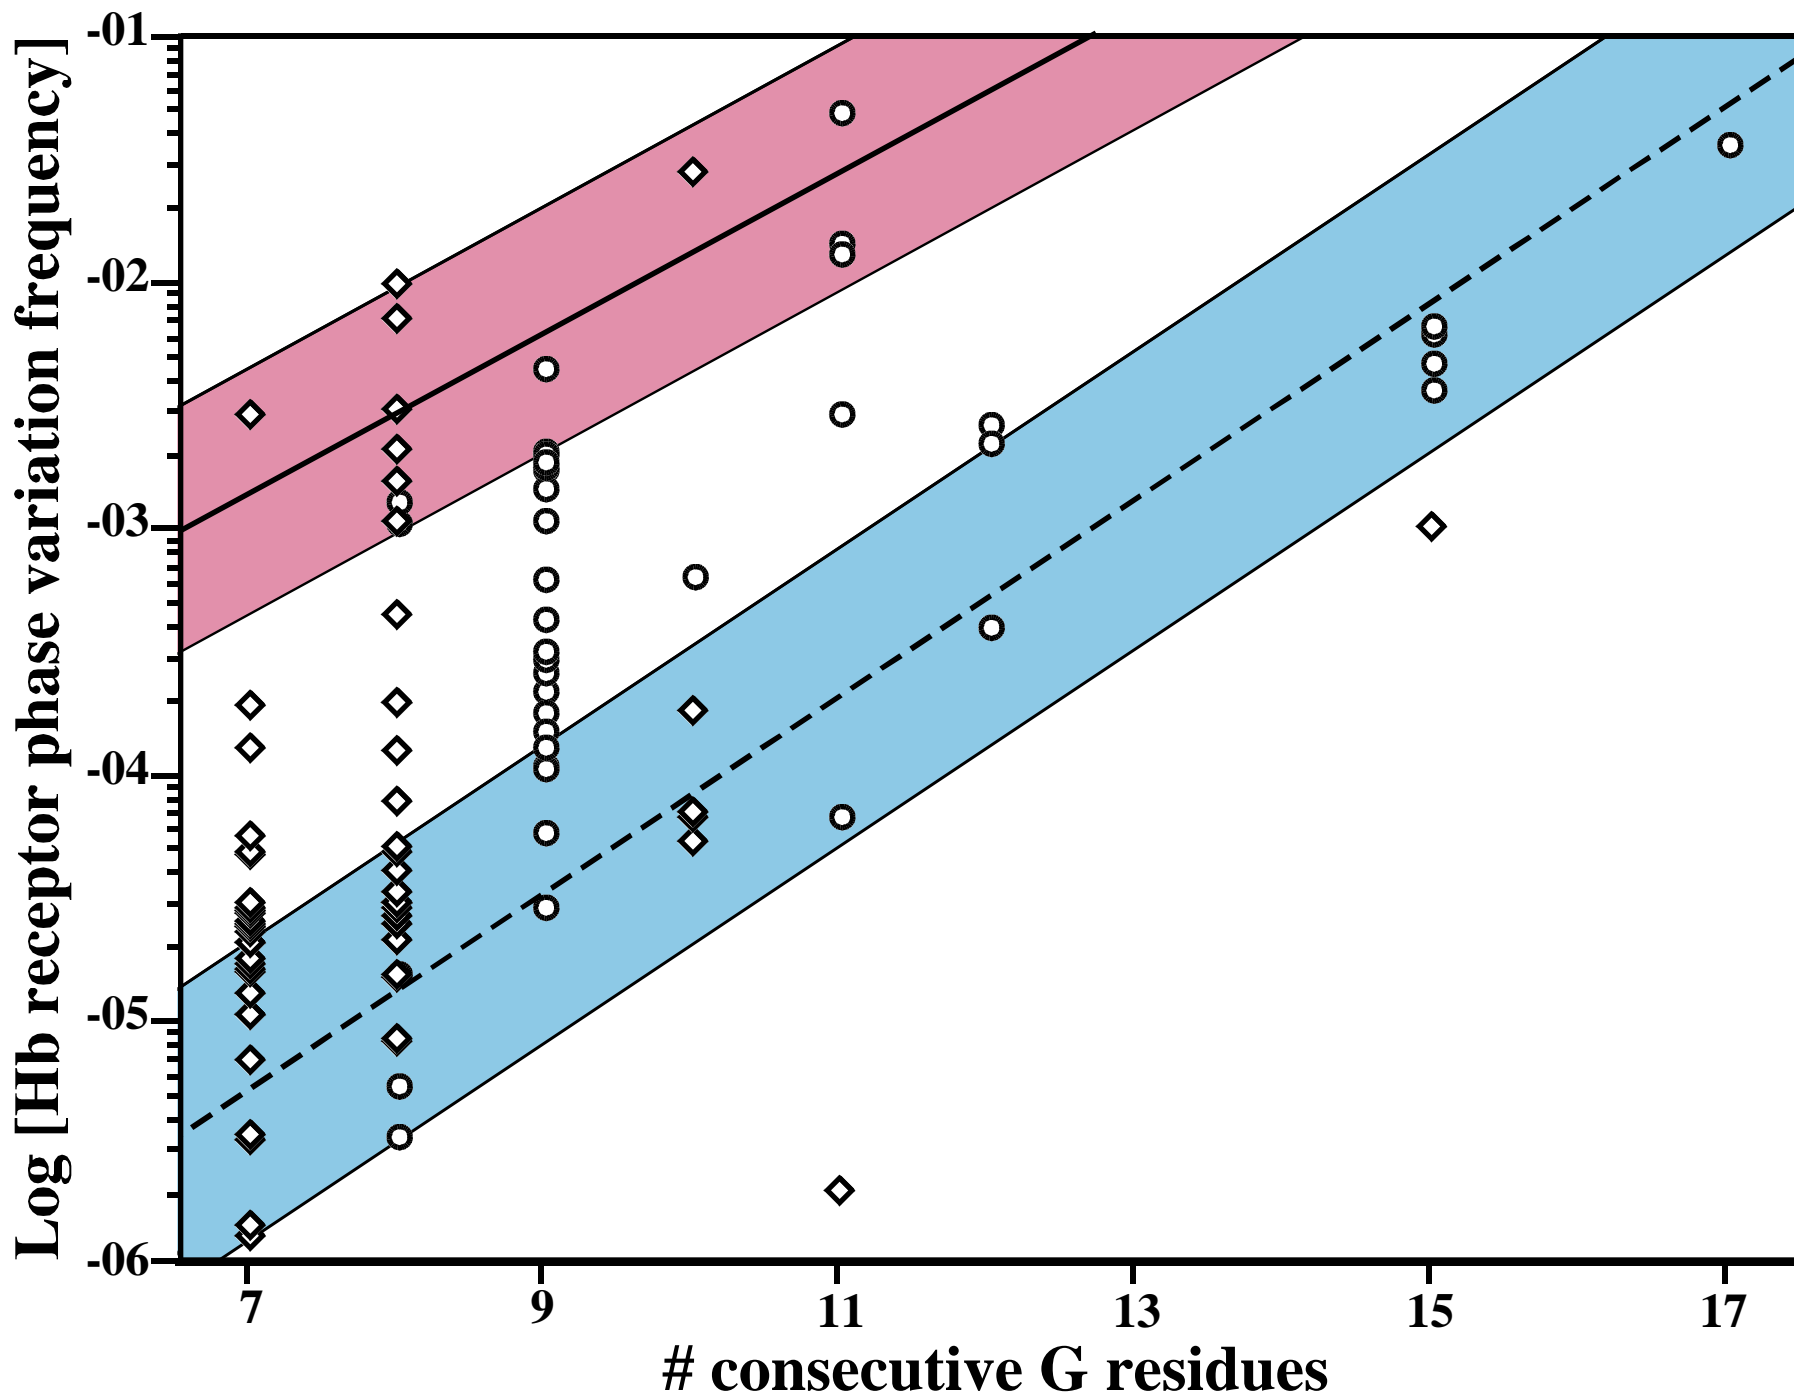

Supplement: pnas_99_9_6103__2.pdf [file pnas_99_9_6103__2.pdf]
